# Supplementary material for: Aliilewinella sediminis gen. nov. sp. nov., isolated from the coastal sediment, and reclassification of some Lewinella species as the members of the genus Alilewinella
Source: Research Square preprint supplement (doi:10.21203/rs.3.rs-2598175/v1), 2023-02-20
Supplement: Supplementary file 1 [file f824c20aebb386ab453a4e46.docx]

***Archives of Microbiology***

**Supplementary Materials**

***Aliilewinella sediminis* gen. nov. sp. nov., isolated from the coastal sediment, and reclassification of some *Lewinella* species as the members of the genus *Alilewinella***

Ya-Jing Zhang1#, Chu-Xuan Ji1#, Fan Li1, Yan-Lin Zhong1, Ya Gong1, 2, * and Zong-Jun Du1, 2, *

1Marine College, Shandong University, Weihai, Shandong, 264209, PR China

2State key Laboratory of Microbial Technology, Shandong University, Qingdao, Shandong, 266237, PR China

#Ya-Jing Zhang and Chu-Xuan Ji contributed equally to this work. #

**
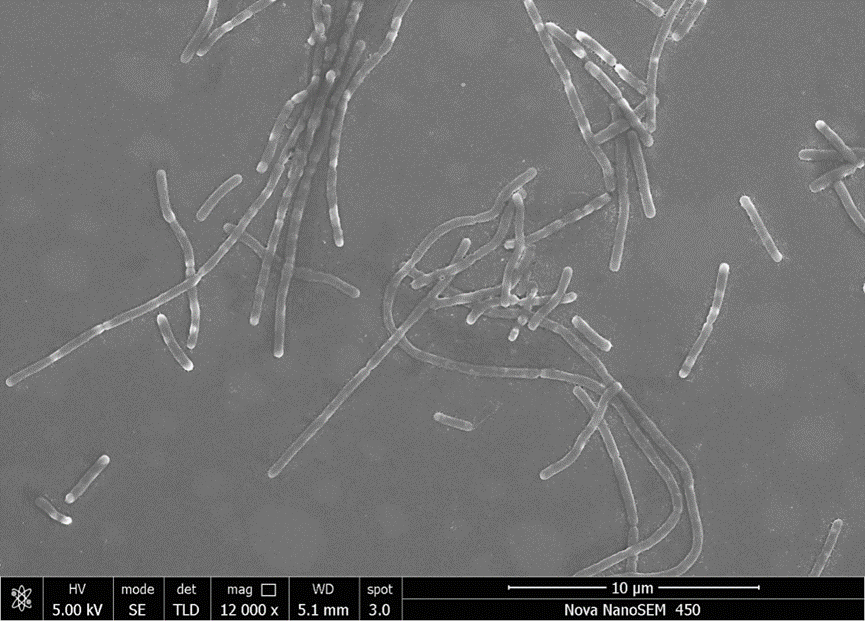
**

**Supplementary Fig S1.** Scanning electron micrograph of cells of strain W8T. Cells were grown on marine agar 2216 at 28 °C for 3 days. Bar, 10 µm.


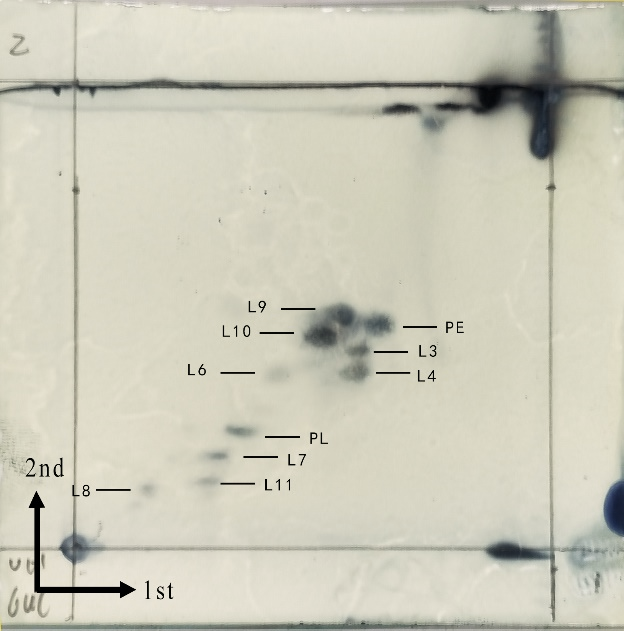

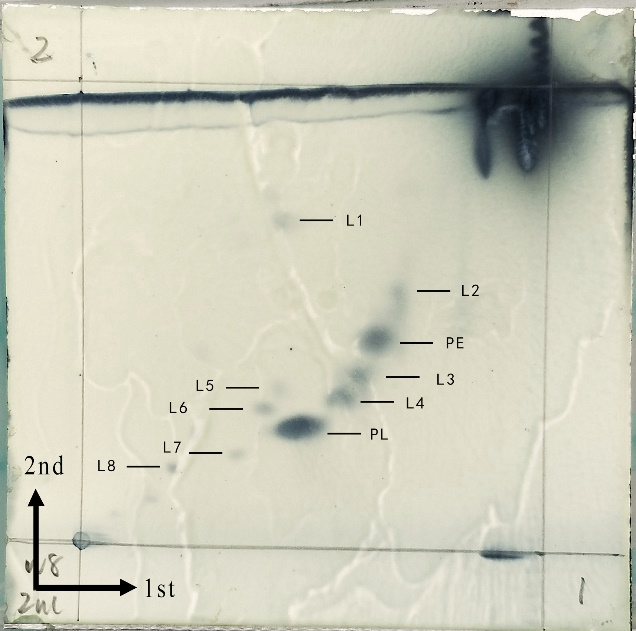


(a) (b)


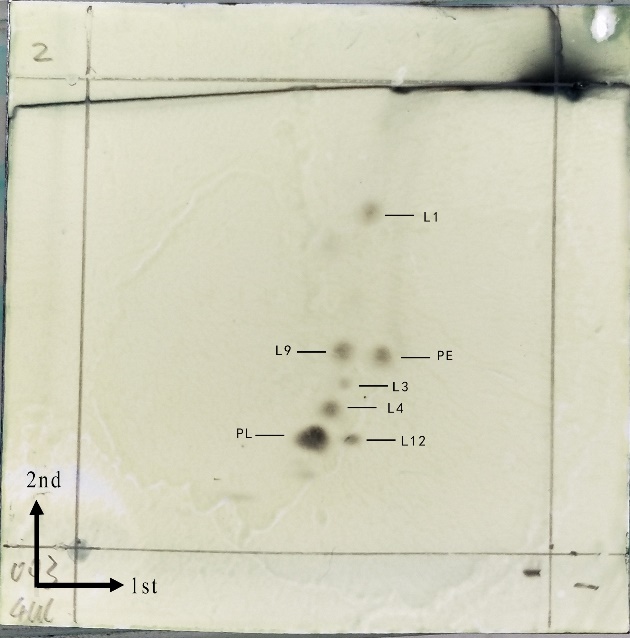

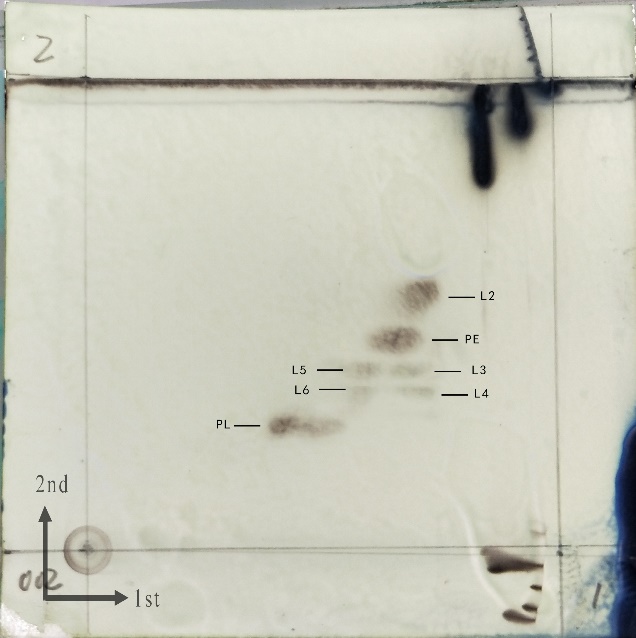


(c) (d)

**Supplementary Fig S2.** Two-dimensional TLC plate images of lipids of strain W8T and three related strains. Strains: a, W8T; b, *L. cohaerens* NBRC 102661T; c, *L. agarilytica* KCTC 12774T; d, *L.* *lacunae* KCTC 42187T. All lipids were shown on the plate after 5 % molybdatophosphoric acid was sprayed.PE, phosphatidylethanolamine; PL, phospholipid; L, lipid.

**Table S1.** The ANI index and dDDH values between the strain W8T and the related type strains in family *Lewinellaceae*.

| Species- strain | ANIm | is DDH |
| --- | --- | --- |
| 2 | 71.09 | 18.8 |
| 3 | 72.25 | 19.2 |
| 4 | 70.92 | 18.9 |
| 5 | 72.27 | 19.7 |
| 6 | 71.02 | 19.0 |
| 7 | 70.56 | 18.3 |
| 8 | 71.83 | 19.1 |
| 9 | 71.5 | 18.4 |
| 10 | 71.04 | 19.9 |
| 11 | 66.38 | 36.7 |

Strains: 1, W8T; 2, *L. agarilytica* KCTC 12774T; 3, *L. lacunae* KCTC 42187T; 4, *L. persica* T-3T; 5, *L. marina* MKG-38T; 6, *L. xylanilytica* 13-9-B8T; 7, *L. antarctica* IMCC3223T; 8, *L. litorea* HSMS-39T; 9, *L. aquimaris* HDW-36T; 10, *L. aurantiaca* SSH13T; 11, *L. cohaerens* NBRC 102661T. The ANI values and dDDH values were significantly lower than the threshold for species boundaries (94-96 % of ANI and 70 % of dDDH).

**Table S2**. The AAI values between the strain W8T and the related type strains in family *Lewinellaceae*.

| AAI | 2 | 3 | 4 | 5 | 6 | 7 | 8 | 9 | 10 | 11 |
| --- | --- | --- | --- | --- | --- | --- | --- | --- | --- | --- |
| 1 | **66.6** | **66.8** | **65.7** | **64.7** | **62.7** | **63.0** | **62.4** | **67.74** | **69.08** | 51.8 |
| 2 |  | **69.0** | **70.5** | **63.9** | **62.1** | **65.5** | **63.9** | **67.36** | **72.79** | 51.4 |
| 3 |  |  | **68.7** | **64.3** | **62.9** | **65.1** | **64.2** | **67.61** | **70.62** | 51.4 |
| 4 |  |  |  | **63.5** | **61.7** | **64.9** | **63.3** | **67.08** | **75.04** | 51.4 |
| 5 |  |  |  |  | **74.7** | **62.3** | **85.8** | **76.5** | **66.78** | 52.4 |
| 6 |  |  |  |  |  | **61.0** | **75.1** | **74.86** | **65.82** | 50.9 |
| 7 |  |  |  |  |  |  | **62.0** | **66.02** | **68.92** | 50.5 |
| 8 |  |  |  |  |  |  |  | **76.61** | **66.71** | 52.1 |
| 9 |  |  |  |  |  |  |  |  | **66.94** | 58.74 |
| 10 |  |  |  |  |  |  |  |  |  | 58.37 |
| 11 |  |  |  |  |  |  |  |  |  |  |

Strains: 1, W8T; 2, *L. agarilytica* KCTC 12774T; 3, *L. lacunae* KCTC 42187T; 4, *L. persica* T-3T; 5, *L. marina* MKG-38T; 6, *L. xylanilytica* 13-9-B8T; 7, *L. antarctica* IMCC3223T; 8, *L. litorea* HSMS-39T; 9, *L. aquimaris* HDW-36T; 10, *L. aurantiaca* SSH13T; 11, *L. cohaerens* NBRC 102661T; Values (≥ 60.0 %) are highlighted in bold.

**Table S3**. The POCP values between the strain W8T and the related type strains in family *Lewinellaceae*.

| POCP | 2 | 3 | 4 | 5 | 6 | 7 | 8 | 9 | 10 | 11 |
| --- | --- | --- | --- | --- | --- | --- | --- | --- | --- | --- |
| 1 | **65.5** | **63.2** | **63.7** | **59.8** | **57.2** | **56.4** | **60.1** | **58.83** | **61.85** | 42.6 |
| 2 |  | **64.3** | **66.7** | **60.3** | **56.8** | **59.0** | **59.7** | **60.27** | **69.78** | 41.5 |
| 3 |  |  | **62.4** | **59.3** | **57.2** | **58.3** | **59.9** | **57.75** | **62.67** | 40.6 |
| 4 |  |  |  | **57.0** | **55.1** | **57.7** | **56.8** | **57.08** | **66.48** | 42.2 |
| 5 |  |  |  |  | **74.7** | **61.7** | **89.7** | **81.44** | **59.89** | 41.6 |
| 6 |  |  |  |  |  | **59.2** | **75.4** | **73.1** | **56.81** | 39.0 |
| 7 |  |  |  |  |  |  | **62.0** | **61.33** | **58.75** | 39.2 |
| 8 |  |  |  |  |  |  |  | **80.32** | **59** | 41.1 |
| 9 |  |  |  |  |  |  |  |  | **60.57** | 40.36 |
| 10 |  |  |  |  |  |  |  |  |  | 41.21 |
| 11 |  |  |  |  |  |  |  |  |  |  |

Strains: 1, W8T; 2, *L. agarilytica* KCTC 12774T; 3, *L. lacunae* KCTC 42187T; 4, *L. persica* T-3T; 5, *L. marina* MKG-38T; 6, *L. xylanilytica* 13-9-B8T; 7, *L. antarctica* IMCC3223T; 8, *L. litorea* HSMS-39T; 9, *L. aquimaris* HDW-36T; 10, *L. aurantiaca* SSH13T; 11, *L. cohaerens* NBRC 102661T; Values (≥ 50.0 %) are highlighted in bold.

**Table S4**. Fatty acid composition (%) of strain W8T and its closely related strains.

| **Fatty acid** | **1** | **2** | **3** | **4** |
| --- | --- | --- | --- | --- |
| **Straight chain** |  |  |  |  |
| C14:0 | tr | tr | 1.2 | 1.1 |
| C16:0 | 4.5 | 3.2 | **18.0** | **11.8** |
| C17:0 | tr | 1.1 | tr | 1.3 |
| C18:0 | tr | tr | 1.9 | 2.2 |
| **Unsaturated** |  |  |  |  |
| C15:1*ω*6*c* | 5.0 | - | 4.3 | 4.5 |
| C17:1*ω*6*c* | 7.8 | - | 4.6 | 6.2 |
| C17:1*ω8c* | 1.8 | - | tr | tr |
| **Branched** |  |  |  |  |
| iso-C14:0 | - | 1.1 | - | - |
| iso-C15:0 | **17.3** | **38.1** | **18.5** | **21.4** |
| iso-C16:0 | tr | 2.5 | tr | - |
| iso-C17:0 | 2.0 | 3.0 | 1.2 | 2.8 |
| iso-C15:1 F | 4.1 | **24.1** | 2.3 | 1.0 |
| iso-C16:1 G | tr | 1.4 | tr | tr |
| iso-C16:1 H | 2.4 | - | - | - |
| **Hydroxy** |  |  |  |  |
| C16:0 3-OH | tr | tr | 2.4 | tr |
| C17:0 3-OH | 1.9 | 2.6 | 1.8 | 1.9 |
| iso-C15:0 3-OH | 2.4 | 3.0 | 1.6 | 2.0 |
| iso-C17:0 3-OH | **11.8** | **10.8** | 4.5 | 8.7 |
| ***Summed feature** |  |  |  |  |
| 2 | - | tr | 1.0 | tr |
| 3 | **20.6** | tr | **28.7** | **19.9** |
| 9 | **11.1** | tr | 2.3 | 9.6 |

Strains:1, W8T; 2, *L. cohaerens* NBRC 102661T; 3, *L. agarilytica* KCTC 12774T; 4, *L.* *lacunae* KCTC 42187T. TR, traces (<1.0 %); −, not detected. Fatty acids amounting (<1.0 %) are not shown, dominant fatty acids (≥10.0 %) are highlighted in bold. All data from the present study. *Summed features represent groups of two or three fatty acids that could not be separated by gas–liquid chromatography with the MIDI system. Summed Feature 2, iso-C16:1 I/C14:0 3-OH; Summed Feature 3, C16:1*ω*7*c*/C16:1*ω*6*c*; Summed Feature 8, C18:1*ω*7*c*/C16:1*ω*6*c*; Summed Feature 9, C16:0 10-methyl/iso-C17:1*ω*9*c*.
